# Supplementary material for: Shape-controllable synthesis of GdVO4photocatalysts and their tunable properties in photocatalytic hydrogen generation
Source: Royal Society of Chemistry journal article supplement (doi:10.1039/c8dt04225j), 2018-12-03
Supplement: c8dt04225j1.pdf [file c8dt04225j1.pdf]

## Supporting information

### Shape-controllable synthesis of GdVO<sub>4</sub> photocatalysts and their tunable properties in photocatalytic hydrogen generation

Paweł Mazierski,<sup>\*a</sup> Jakub Sowik,<sup>a</sup> Magdalena Miodyńska,<sup>a</sup> Grzegorz Trykowski,<sup>b</sup> Alicja Mikołajczyk,<sup>a</sup> Tomasz Klimczuk,<sup>c</sup> Wojciech Lisowski,<sup>d</sup> Joanna Nadolna,<sup>a</sup> and Adriana Zaleska-Medynska<sup>a</sup>

<sup>a</sup> Department of Environmental Technology, University of Gdansk, 80-308 Gdansk, Poland

<sup>b</sup> Faculty of Chemistry, Nicolaus Copernicus University, 87-100 Torun, Poland.

<sup>c</sup> Department of Solid State Physics, Gdansk University of Technology, 80-233 Gdansk, Poland

<sup>d</sup> Institute of Physical Chemistry, Polish Academy of Science, 01-224 Warsaw, Poland

<sup>\*</sup>Corresponding Author: Paweł Mazierski, E-mail: pawel.mazierski@ug.edu.pl

#### Contents:

|                                                                                           |   |
|-------------------------------------------------------------------------------------------|---|
| Figure S1. HR XPS spectra of V 2p, O 1s and Ga 4d for GdVO <sub>4</sub> at various shape. | 2 |
| Figure S2. Nitrogen adsorption-desorption isotherms                                       | 3 |
| Figure S3. Pore size distribution curve (BJH Desorption dV/dD Pore Volume)                | 4 |

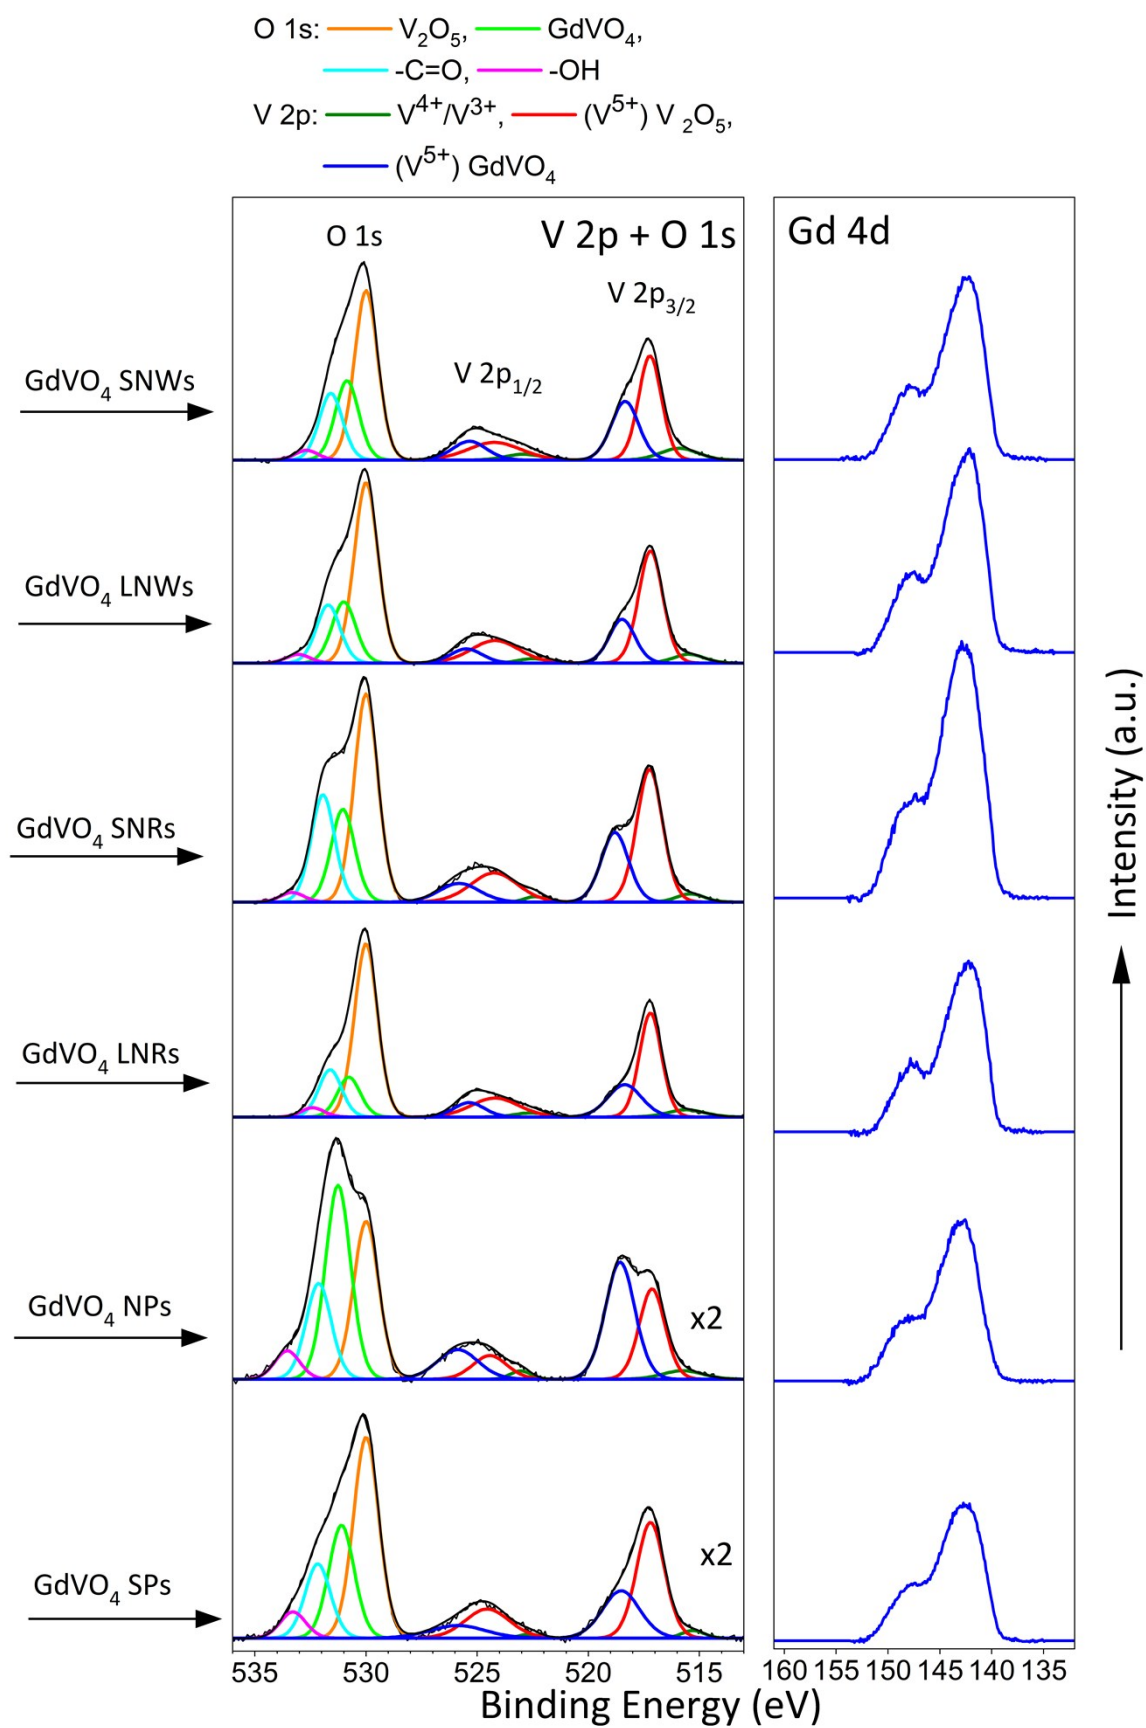

**Figure S1.** HR XPS spectra of V 2p, O 1s and Ga 4d for GdVO<sub>4</sub> at various shape.

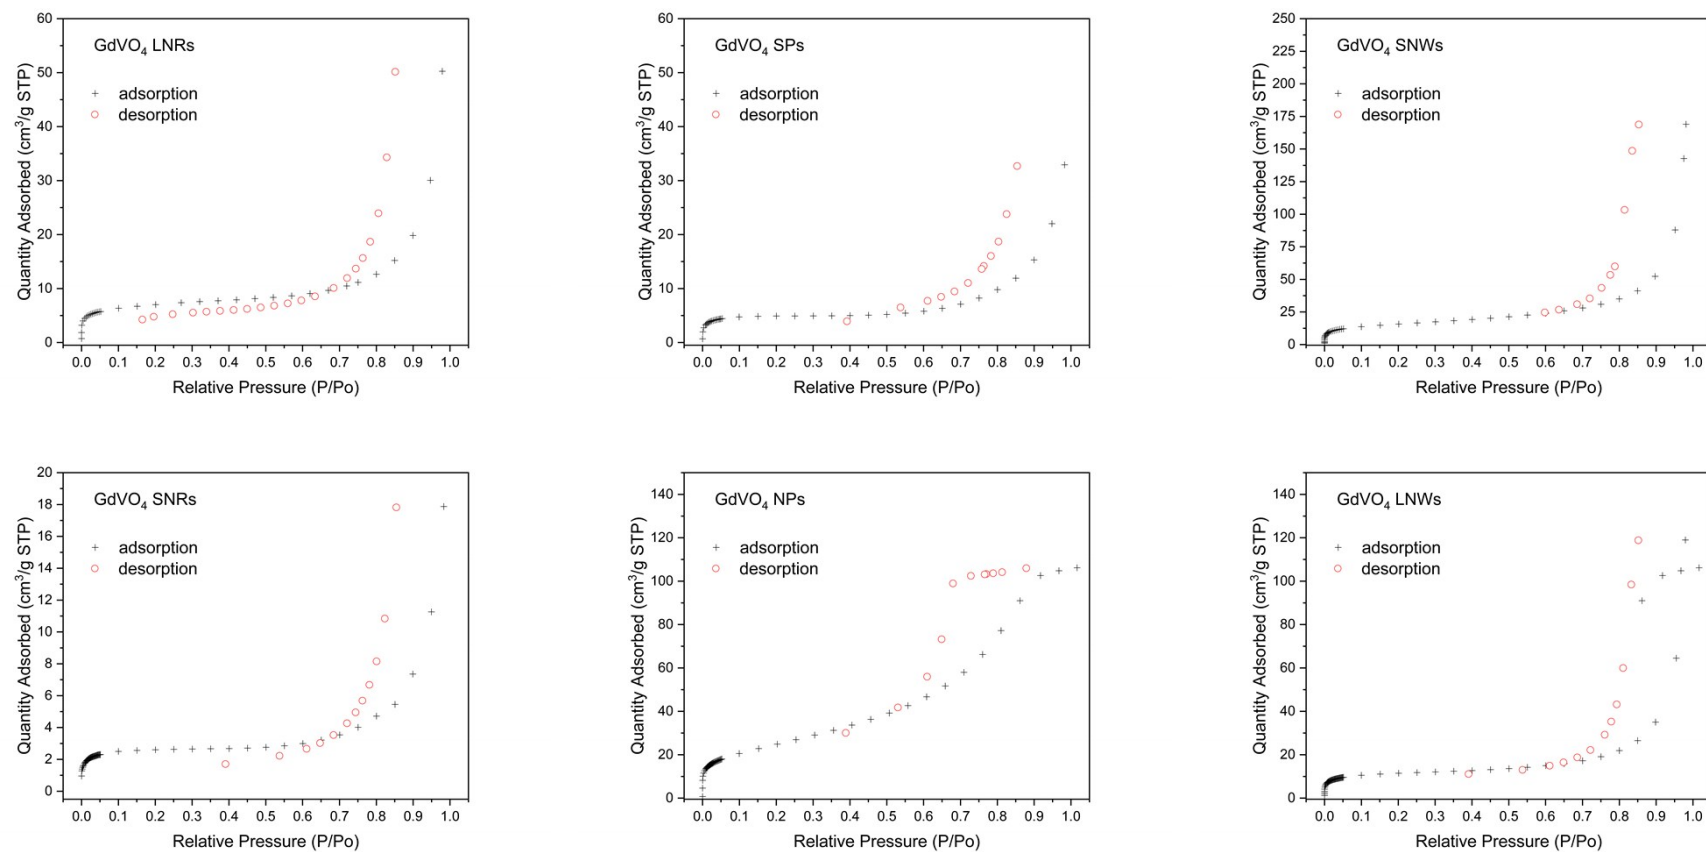

**Figure S2.** Nitrogen adsorption-desorption isotherms

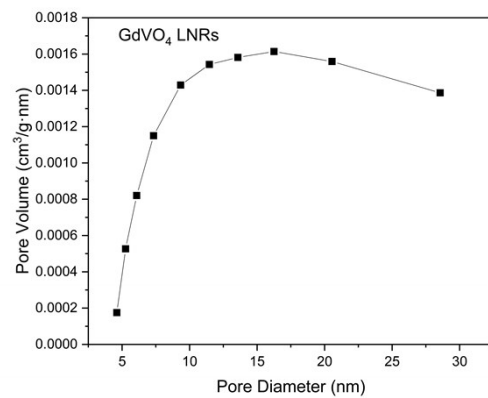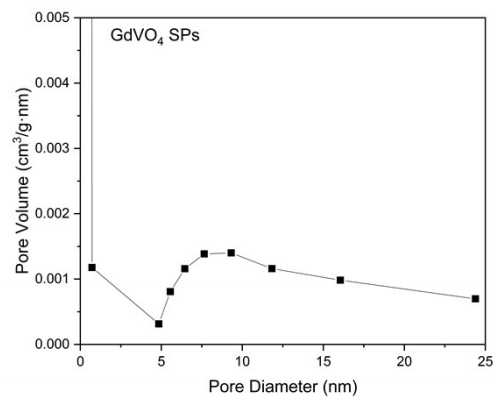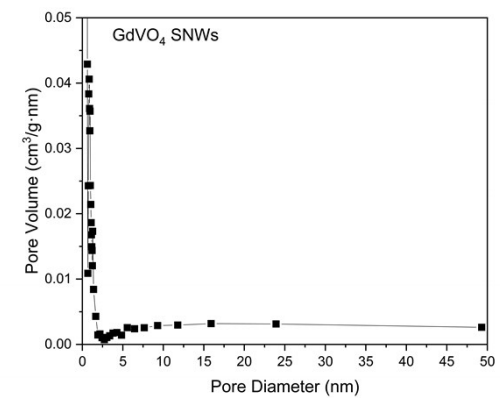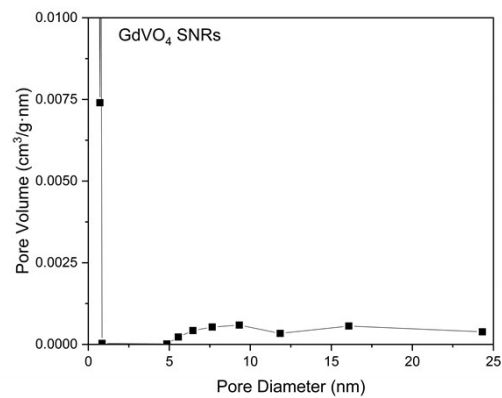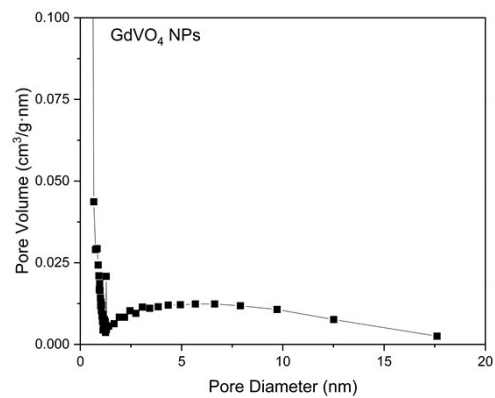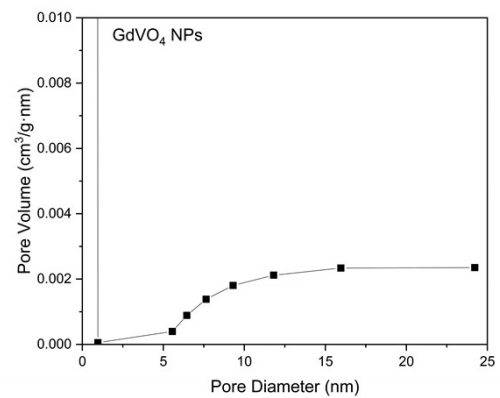

**Figure S3.** Pore size distribution curve (BJH Desorption dV/dD Pore Volume)
